# Supplementary material for: Oxidation kinetic mechanism of n-decane under high temperature and pressure: a first-principles molecular dynamics study
Source: Royal Society of Chemistry journal article supplement (doi:10.1039/d3cp04542k), 2023-01-01
Supplement: d3cp04542k1.pdf [file d3cp04542k1.pdf]

## Supplementary Material 1 for

### **Oxidation kinetic mechanism of n-decane under high temperature and pressure: a first-principles molecular dynamics study**

**Teng Zhang<sup>a,&</sup>, Wenbo Xia<sup>b,&</sup>, Wei Fan<sup>c,\*</sup>, Lang Chen<sup>a,\*</sup>, Jun Chen<sup>d,e,\*</sup>**

<sup>a</sup> Beijing Institute of Technology, Beijing 100081, China

<sup>b</sup> AECC Shenyang Engine Research Institute, Shenyang 110015, China

<sup>c</sup> Northwestern Polytechnical University, Xi'an 710129, China

<sup>d</sup> Laboratory of Computational Physics, Institute of Applied Physics and Computational Mathematics, Beijing 100088, China

<sup>e</sup> HEDPS, Center for Applied Physics and Technology, and College of Engineering, Peking University, Beijing 100871, China

<sup>&</sup> Co-first author. Email: [zt05251130@163.com](mailto:zt05251130@163.com). (Teng Zhang); [xwb874456074@126.com](mailto:xwb874456074@126.com). (Wenbo Xia)

<sup>\*</sup> Corresponding Author. Email: [weifan419@nwpu.edu.cn](mailto:weifan419@nwpu.edu.cn). (Wei Fan); [chenlang@bit.edu.cn](mailto:chenlang@bit.edu.cn). (Lang Chen); [jun\\_chen@iapcm.ac.cn](mailto:jun_chen@iapcm.ac.cn). (Jun Chen)

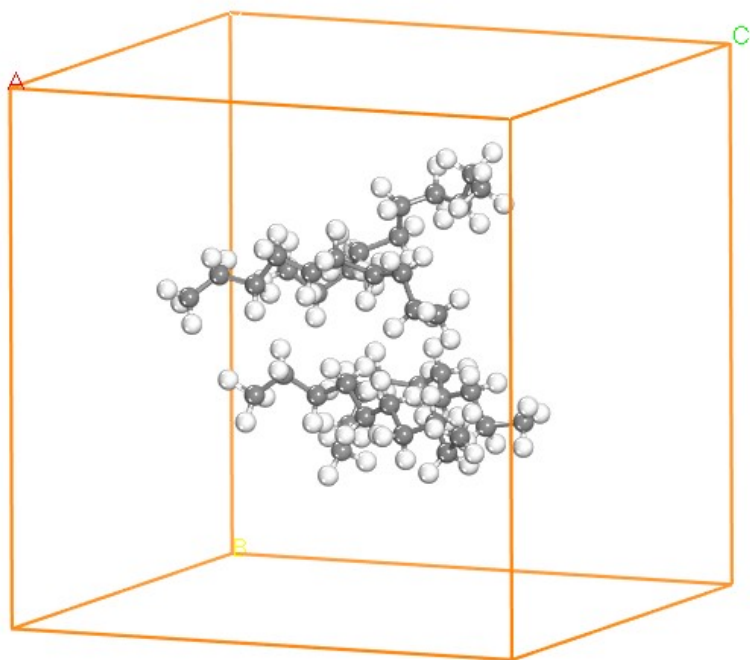

**Figure S1.** The computational model of  $C_{10}H_{22}$  pyrolysis.

---

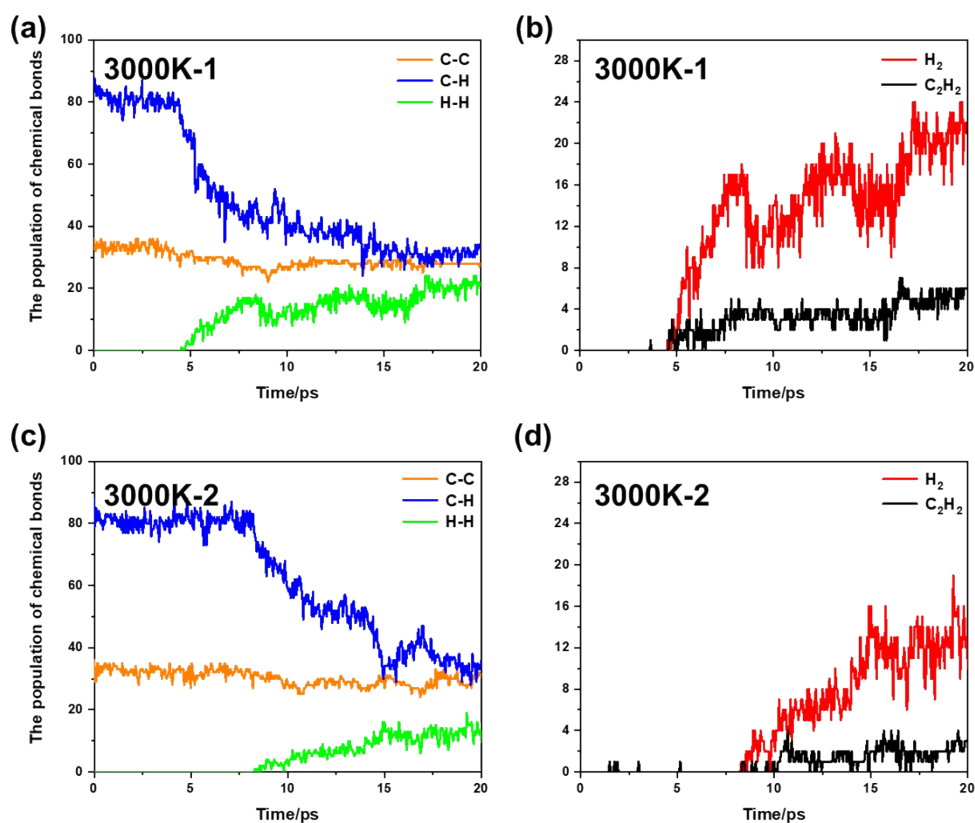

**Figure S2.** The time evolution of population of chemical bonds and species at 3000K.

Here, the two simulation results of C<sub>10</sub>H<sub>22</sub> pyrolysis under 3000K and 4MPa are shown in Figure S2. In other simulation results under 2400 and 2700K, their overall rate of pyrolysis is obviously slower than that of 3000K. With only fewer short-chain CH intermediates (C<sub>4</sub>, C<sub>5</sub>, C<sub>6</sub> and C<sub>7</sub>) formation, the time evolution of the population of chemical bonds and species under 2400 and 2700K is no clear trend. Therefore, the simulation results under 2400 and 2700K will not be shown in Figure S2.

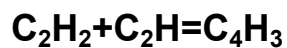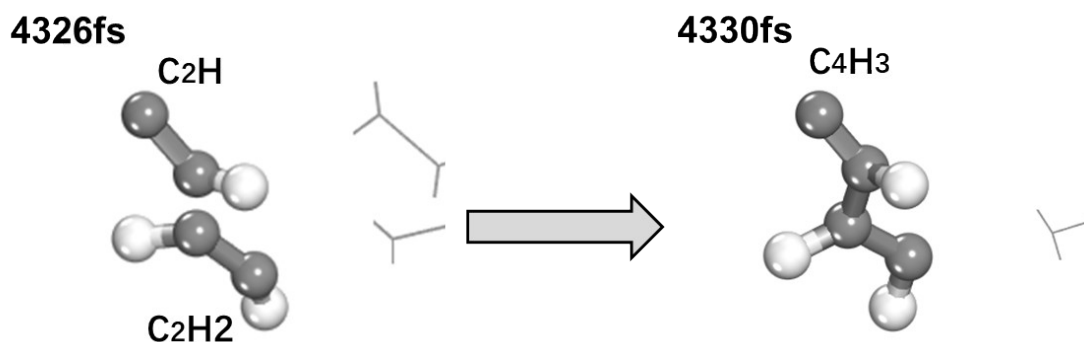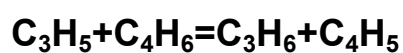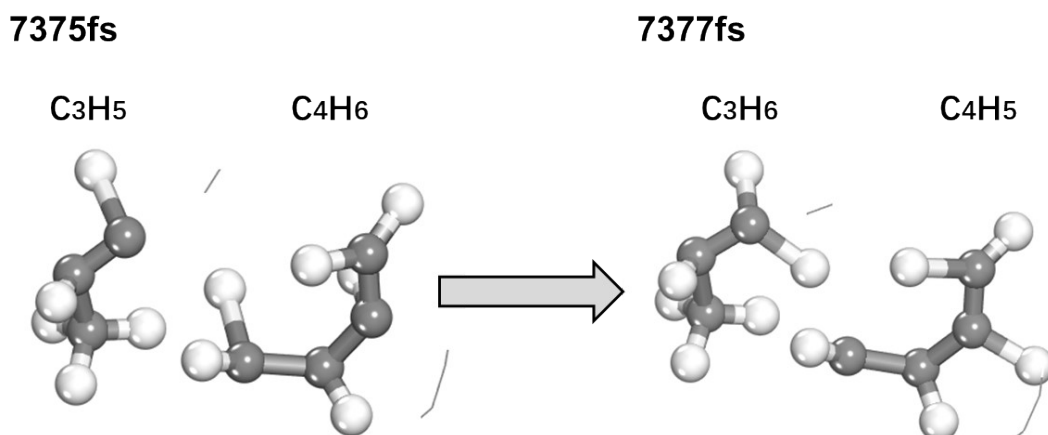

**Figure S3.** The reaction snapshot of  $\text{C}_{10}\text{H}_{22}$  pyrolysis.

In the process of  $\text{C}_{10}\text{H}_{22}$  pyrolysis, observe the  $\text{C}_x\text{H}_y$ -related reactions. These reactions mainly include intermolecular H transfer and bimolecular complexation reactions. The reactions obtained from the pyrolysis simulations are used as a complement to that of the oxidation simulations. Figure S3 shows partial reaction snapshots.

## Reaction track

According to the atomic position at every moment, the information on breaking or forming chemical bonds of chemical species is determined by self-compiled programs. The reaction occurring within a period of time is given according to the situation of breaking or forming chemical bonds between atoms within a period of time. Finally, the detailed reaction steps are obtained by combining the reaction snapshot.

Below, five reactions are given as examples:

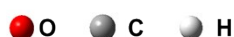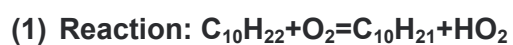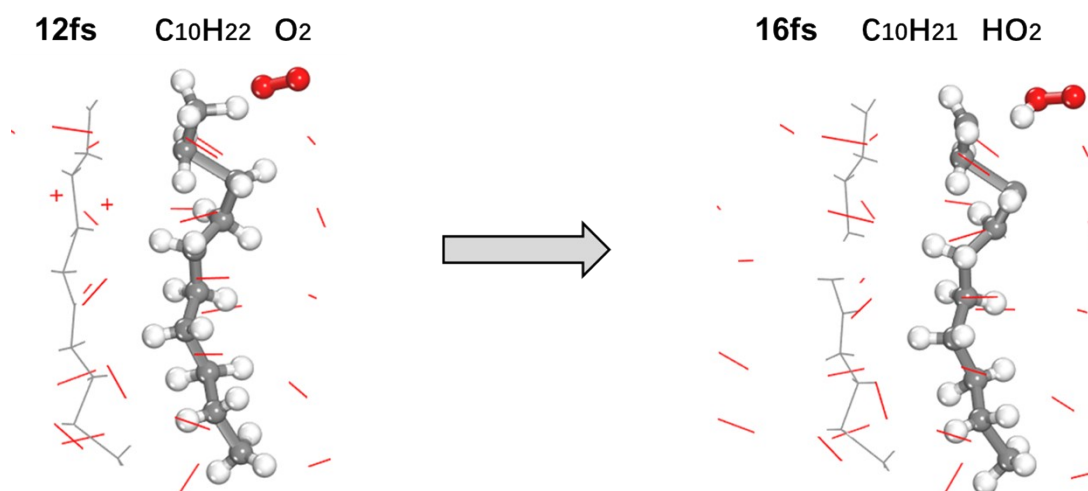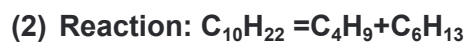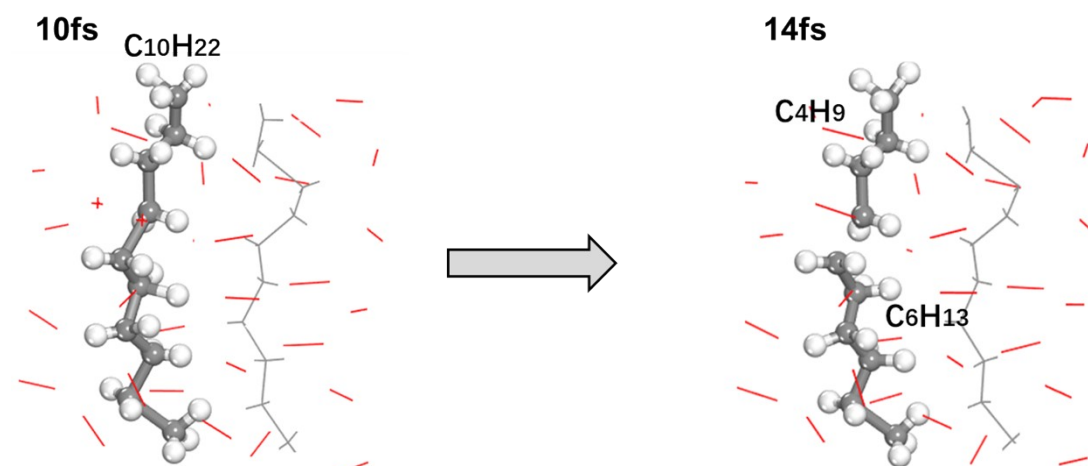

(3) Reaction:  $C_2H_3 + HO_2 = CH_2CHO + OH$

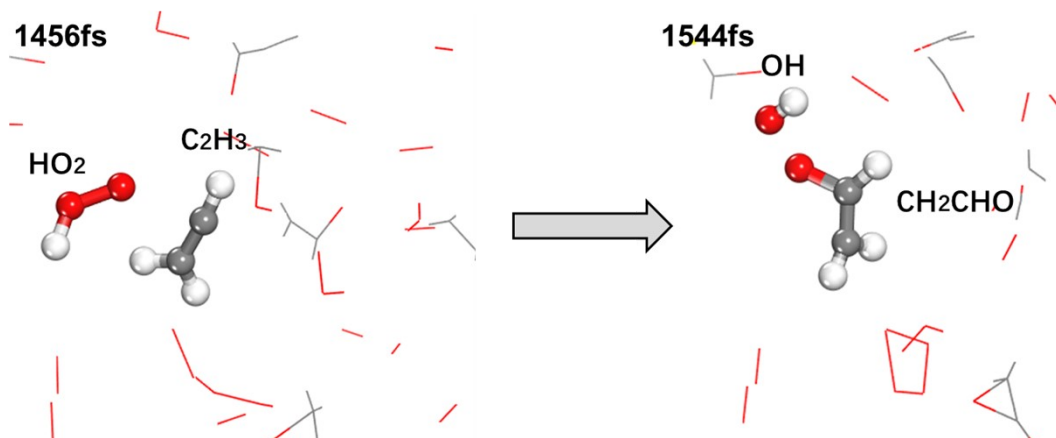

(4) Reaction:  $C_4H_4 + O = C_3H_3 + HCO$

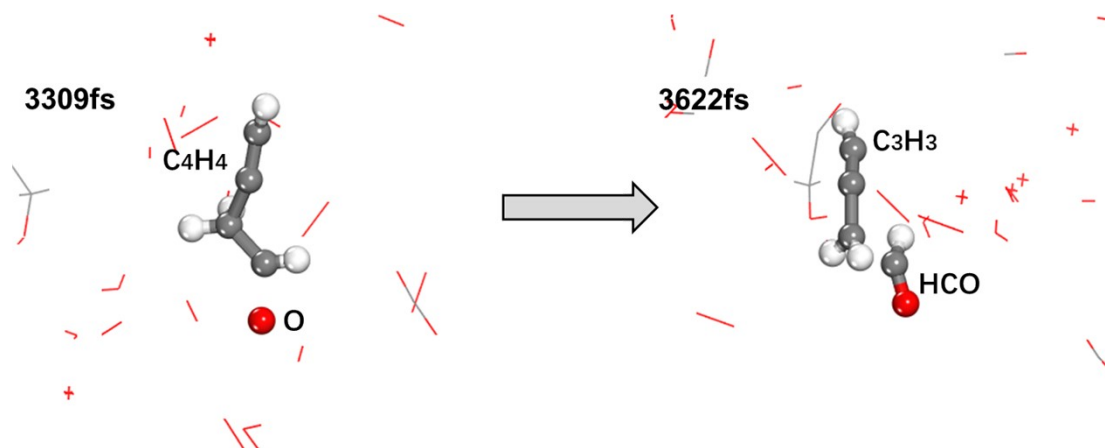

(5) Reaction:  $HCO + O_2 = CO + HO_2$

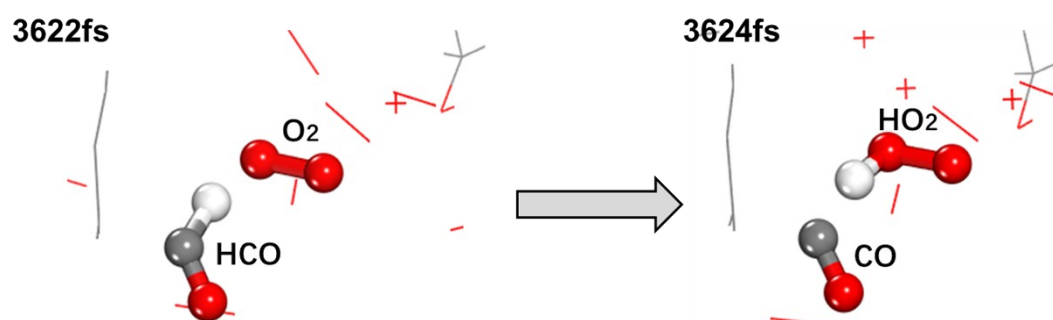

**Figure S4.** The reaction snapshot of  $C_{10}H_{22}$  oxidation.
